# Supplementary material for: The DNA dioxygenase ALKBH2 protects Arabidopsis thaliana against methylation damage
Source: PubMed Central journal article supplement — Nucleic Acids Res. 2012 Apr 24;40(14):6620–31. doi: 10.1093/nar/gks327 (PMC3413135; doi:10.1093/nar/gks327), 2012-04-24
Supplement: supp_gks327_nar-00561-d-2012-File003.pdf [file supp_gks327_nar-00561-d-2012-File003.pdf]

## Supplementary Data - Meza et. al.

Supplementary Table 1 - Primer sequences

| <b>Primer name</b>      | <b>Primer sequence (5'- 3')</b>                                                             | <b>Application</b> |
|-------------------------|---------------------------------------------------------------------------------------------|--------------------|
| 1414                    | TCC TCT TCG CTC CAT TGC TCG GA                                                              | RT-PCR             |
| 1415                    | GCC CTC TGC CTT TGC ACG CT                                                                  | RT-PCR             |
| Ds-5                    | CGT TCC GTT TTC GTT TTT TAC C                                                               | Genotyping         |
| Ds-3                    | CCG GTA TAT CCC GTT TTC G                                                                   | Genotyping         |
| 598                     | TGG AAT CTT TTC TTG GTA TC                                                                  | Genotyping         |
| 599                     | CCG TTT TTG TTT AGA ATC AC                                                                  | Genotyping         |
| 1418                    | TCC ACC GCC GCT AAT CGC TCT                                                                 | RT-PCR             |
| 1419                    | CTC CAC CGC CAC AAT CGA TGT CA                                                              | RT-PCR             |
| 1420                    | CCT CTT CGC TCC ATT GCT CGG AA                                                              | RT-PCR             |
| 1421                    | AGA GCG ATT AGC GGC GGT GGA                                                                 | RT-PCR             |
| attB1-AtALKBH2-promoter | GGG GAC AAG TTT GTA CAA AAA AGC AGG CTT AGG TCG TAT TCA GTC TCT CCA TGG AGA AGT TGG GTT GGT | DNA cloning        |
| attB2-AtALKBH2-promoter | GGG GAC CAC TTT GTA CAA GAA AGC TGG GTA GTT AGA AAG CTA GTC GCC GGG TTT CGC TCC TCC TTA AT  | DNA cloning        |
| 17-AtALKBH2-fwd         | ACT ACT GGC ATA TGA CGA ATC CAC TTA ATT CCA CCG                                             | DNA cloning        |
| 18-AtALKBH2-rev         | ATG TAG ACG GAT CCT TAC AAA ACA AGC CTG AAT GTG AGG                                         | DNA cloning        |
